# Supplementary material
Source: MDPI journal article supplement (https://www.mdpi.com/1911-8074/7/2/67)
Supplement: s1 [file s1]

######################################################################################
# Instructions:
#   1. Save this file as, e.g., fun-betahet.R
#   2. In R, source the file as in
#	> source("fun-betahet.R")
#      This will readin the defintion of the function 'beta.het' and will run the code
#      in the Examples section.
#
######################################################################################
beta.het <- function(data,market,rkfree,symbol,plot=TRUE,ask=FALSE,alpha.h=.3,alpha=0.05,tau.lo=0.1,tau.hi=0.9){
# Function to compute the test statistic for diverging/converging heteroskedasticity
#  and plot the results
# Name:beta.het
# Title: Test for diverging/converging heteroskedasticity.
# Description:
#	Function to compute the test statistic for diverging/converging 
#	heteroskedasticity and plot the results
# Usage: beta.het(data, market, rkfree, symbol, plot = TRUE, ask = FALSE, 
#	alpha.h = 0.3, alpha = 0.05)
# Arguments:
#  data: returns of a particular stock.
#  market: returns of the market.
#  rkfree: risk free rate.
#  symbol: Tick symbol for the stock.
#  plot: logical. If 'TRUE', the quantile regressions and regression quantile 
#	coefficients will be plotted.
#  ask: logical. If 'TRUE', the user will be prompted before the results are plotted.
#  alpha.h: the level of significance to determine if the stock is classified as 
#	diverging/converging; default to 0.3.
#  alpha: level of significance used to construct the confidence intervals of 
#	the regression quantile coefficients; default to 0.05.
#  tau.lo: 'tau' for the lower regression quantile beta coefficient that defines 
#  diverging/converging heteroskedasticity; default to 0.1
#  tau.hi: 'tau' for the upper regression quantile beta coefficient that defines 
#  diverging/converging heteroskedasticity; default to 0.9
# Details:
#	Compute the Wald test statistic for heteroskedasticity as proposed in 
#	Koenker and Bassett (1982). If 'plot' is 'TRUE', the summary statistics 
#	will be displayed in the plot along with the quantile regression fits and 
#	regression quantile coefficients of the intercept and slopes. The 'green' line 
#	in the quantile regression fits is the ordinary least squares regression fit, 
#	the dotted black line is the 'tau'=0.5 quantile regression fit while the solid 
#	black lines are the 'tau'=0.1,0.3,0.7 and 0.9 quantile regression fits.
# Value:
#  alpha: ordinary least squares regression estimate of the intercept.
#  beta: ordinary least squares regression estimate of the slope.
#  rsquare:r-square of the ordinary least squares regression fit.
#  mean: mean of the returns of the stock.
#  sd: standard deviation of the returns of the stock.
#  CV: coefficient of variation of the returns of the stock.
#  Sharpe: Sharpe's ratio of the returns of the stock.
#  Treynor: Treynor's ratio fo the returns of the stock.
#  Wald.het: Value of the Wald test statistic for heteroskedasticity
#  p.value.het: p-value of the Wald test for heteroskedasticity.
#  beta.diff: interdecile range ('tau'=0.9 - 'tau'=0.1) of the regression quantile 
#	beta coefficient.
#  angle: angle (degrees) between the diverging/converging slopes of the regresson quantile 
#	beta coefficient
#  diverging: logial; if 'TRUE', the stock returns is classified as exhibiting diverging 
# 	heteroskedasticity.
#  homoskedastic: logial; if 'TRUE', the stock returns is classified as exhibiting 
#	homoskedasticity.
#  p.value.sym: p-value of the Miao, Gel and Gastwirth (2006) test of symmetry.
# References:
#  Koenker, R. and Bassett, G. (1982). Robust tests for heteroscedasticity based on 
#	regression quantiles. Econometrica,50,43-61.
#  Miao, W., Gel, Y. R., and Gastwirth, J. L. (2006). A new test of symmetry about an 
#	unknown median. Random Walk, Sequential Analysis and Related Topics - A 
#	Festschrift in Honor of Yuan-Shih Chow. Eds.: Agnes Hsiung, Cun-Hui Zhang, and 
#	Zhiliang Ying, World Scientific Publisher, Singapore.
# Author: Pin T. Ng
# Examples:
#	require(zoo)
# 	require(tseries)
#	start <- "1999-01-01"
#	end <- "2013-08-31"
#	# obtain the risk free rate from http://quote.yahoo.com/
#	kfree.annual <- get.hist.quote("^irx",start=start,end=end,quote="AdjClose",
#	compression="w",provider="yahoo")
#	rkfree <- as.numeric((1+rkfree.annual/100)^(1/52)-1) #annualize the weekly rate
#	x <- get.hist.quote("^gspc",start=start,end=end,quote="AdjClose",compression="w",
#	provider="yahoo")
#	lx <- length(x)
#	market <- as.numeric(diff(x)/as.numeric(x[-lx]))
#	y <- get.hist.quote("penn",start=start,end=end,quote="AdjClose",compression="w",
#	provider="yahoo")
#	ly <- length(y)
#	stock <- as.numeric(diff(y)/as.numeric(y[-ly]))
#	beta.het(stock,market,rkfree,"PENN")
######################################################################################
# Preamble
if(!require(quantreg)) stop("The package 'quantreg' is not installed. Please install 'quantreg' before calling the function 'beta.het'")
if(!require(lawstat)) stop("The package 'lawstat' is not installed. Please install 'lawstat' before calling the function 'beta.het'")
rkfree.mean <- mean(rkfree)
div.lab <- c("No","Yes")
con.lab <- c("No","Yes")
taus <- seq(tau.lo,tau.hi,length=5)
ltaus <- length(taus)
cl <- (1-alpha/2)
homo <- con <- div <- anova.o <- beta.diff <- sym.o <- vector("numeric",1)
row.names <- c("alpha","beta","r-square","mean","sd","CV","SHP","TRN","Wald.het","p.value.het",
"beta.diff","angle","con","div","homo","p.value.sym")
rqplot.o <- vector("numeric",length(row.names))
names(rqplot.o) <- row.names
formula <- y~x
x <- market
y <- data
# Perform least-squares regression and assign values to rqplot.o
lm(formula) -> lm.o
rqplot.o["alpha"] <- lm.o$coef[1]
rqplot.o["beta"] <- lm.o$coef[2]
rqplot.o["mean"] <- mean(y,na.rm=TRUE)
rqplot.o["sd"] <- sd(y,na.rm=TRUE)
rqplot.o["CV"] <- rqplot.o["sd"]/rqplot.o["mean"]*100
rqplot.o["SHP"] <- (rqplot.o["mean"] - rkfree.mean)/rqplot.o["sd"]
rqplot.o["TRN"] <- (rqplot.o["mean"] - rkfree.mean)/rqplot.o["beta"]
summary.o <- summary(lm.o)
rqplot.o["r-square"] <- summary.o$r.squared
fit.lm.l1.o <- summary.o$coeff
p <- nrow(fit.lm.l1.o)
fit1 <- array(fit.lm.l1.o,c(p,4,ltaus))
# Perform quantile regression for taus and assing results to rqplot.o
for(i in 1:ltaus){
	f <- rq(formula,tau=taus[i])
	assign(paste("rq.o.",taus[i],sep=""),f)
	try(fit1[,,i] <- suppressWarnings(summary(f,se="nid",alpha=alpha)$coefficient))
}
# Perform the Wald Test for heteroskedasiticy as proposed in Koenker and Bassett (1982)
#  and store the results in rqplot.o
rqplot.o["p.value.het"] <- anova.o <- suppressWarnings(as.numeric(anova(get(paste("rq.o.",taus[1],sep="")),get(paste("rq.o.",taus[ltaus],sep="")))$table[4]))
rqplot.o["Wald.het"] <- anova.o <- suppressWarnings(as.numeric(anova(get(paste("rq.o.",taus[1],sep="")),get(paste("rq.o.",taus[ltaus],sep="")))$table[3]))
rqplot.o["beta.diff"] <- beta.diff <- fit1[2,1,ltaus]-fit1[2,1,1]
rqplot.o["angle"] <- (fit1[2,1,ltaus]-fit1[2,1,1])*180/pi
# Preamble setting for the scatter plot
devAskNewPage(ask=ask)
layout(matrix(c(1,2,3,4), 2, 2, byrow = TRUE))
if(anova.o<alpha.h){
#The color for plot main titles is set to red for diverging/converging 
#  heteroskedasticity
	par(col.main="red") 
	rqplot.o["homo"] <- homo <- 0
	if(beta.diff>0){
		 rqplot.o["div"] <- div <- 1 
	}
	else {
		rqplot.o["con"] <- con <- 1
	}
}
else { 
#The color for plot main titles is set to black for non-diverging/converging 
#  heteroskedasticity
	par(col.main="black")
	rqplot.o["homo"] <- homo <- 1
}
#Perform a symmetry test on the firm's returns
rqplot.o["p.value.sym"] <- sym.o <- symmetry.test(y,"mgg.test")$p.value
# Plot the results
if(plot){
	ycor <- 10
	xcor <- 1
	plot(1:10,type="n",xlab="",ylab="",xaxt="n",yaxt="n",main="Summary Statistics")
	text(xcor,ycor-1,paste("symbol=",symbol),adj=0)
	text(xcor,ycor-2,paste("Heteroskedasticity Test p-value =",round(anova.o,2)),adj=0)
	text(xcor,ycor-3,paste("Diverging:",div.lab[div+1]),adj=0)
	text(xcor,ycor-4,paste("Converging:",con.lab[con+1]),adj=0)
	text(xcor,ycor-5,substitute(list(alpha) == list(alphavalue) ,list(alphavalue=round(rqplot.o["alpha"],2))),adj=0)
	text(xcor,ycor-6,substitute(list(beta) == list(betavalue) ,list(betavalue=round(rqplot.o["beta"],2))),adj=0)
	text(xcor,ycor-7,substitute(list(R^2) == list(rsq.value),list(rsq.value=round(rqplot.o["r-square"],2))),adj=0)
	text(xcor,ycor-8,paste("Symmetry Test p-value =",round(rqplot.o["p.value.sym"],2)),adj=0)
	plot(x,y,type="n",xlab=expression(R[m]),ylab=expression(R[i]),
	main="Quantile Regression Fits")
	points(x,y,cex=.5,col="blue")
	abline(lm.o,lty=1,col="green",lwd=2)
	abline(v=0,h=0,lty=3)
	for(i in 1:length(taus)){
		if(taus[i]==.5) abline(fit1[,1,i],col="black",lty=2,lwd=2) 
		else abline(fit1[,1,i],col="black",lwd=2)
	}
	blab <- c("Intercept",expression(R[m]))
	for(i in 1:p){
		b <- fit1[i,1,]
		b.p <- b + qnorm(cl)*fit1[i,2,]
		b.m <- b - qnorm(cl)*fit1[i,2,]
		bhat <- fit.lm.l1.o[i,1]
		bhat.se <- fit.lm.l1.o[i,2]
		plot(0:1,range(c(b.m,b.p,bhat-qnorm(cl)*bhat.se, 
		bhat+qnorm(cl)*bhat.se)),type="n",xlab="Quantile",ylab=blab[i], 
		main="RQ Coefficient")
		polygon(c(taus,rev(taus)),c(b.p,rev(b.m)),col="gray",lty=1,lwd=3)
		points(taus,b,pch=19 )
		lines(taus,b)
      	 	abline(h=0,lwd=3)
      	 	abline(h=bhat,lty=2,lwd=3)
	       	abline(h=bhat-qnorm(cl)*bhat.se,lty=3,lwd=3)
       	 	abline(h=bhat+qnorm(cl)*bhat.se,lty=3,lwd=3)
	}
}
list("alpha"=round(as.numeric(rqplot.o["alpha"]),4),"beta"=round(as.numeric(rqplot.o["beta"]),4),
"rsquare"=round(as.numeric(rqplot.o["r-square"]),4),"mean"=round(as.numeric(rqplot.o["mean"]),4),
"sd"=round(as.numeric(rqplot.o["sd"]),4),"CV"=round(as.numeric(rqplot.o["CV"]),4),
"Sharpe"=round(as.numeric(rqplot.o["SHP"]),4),"Treynor"=round(as.numeric(rqplot.o["TRN"]),4),
"Wald.het"=round(as.numeric(rqplot.o["Wald.het"]),4),
"p.value.het"=round(as.numeric(rqplot.o["p.value.het"]),4),"beta.diff"=round(as.numeric(rqplot.o["beta.diff"]),4),
"angle"=round(as.numeric(rqplot.o["angle"]),2),"converging"=as.integer(rqplot.o["con"]),
"diverging"=as.integer(rqplot.o["div"]),"homoskedastic"=as.integer(rqplot.o["homo"]),
"p.value.sym"=round(as.numeric(rqplot.o["p.value.sym"]),4))
}

######################################################################################
# Run the following example
	require(zoo)
 	require(tseries)
	start <- "1999-01-01"
	end <- "2013-08-31"
# obtain the risk free rate from http://quote.yahoo.com/
	rkfree.annual <- get.hist.quote("^irx",start=start,end=end,quote="AdjClose",
	compression="w",provider="yahoo")
	rkfree <- as.numeric((1+rkfree.annual/100)^(1/52)-1) #annualize the weekly rate
	x <- get.hist.quote("^gspc",start=start,end=end,quote="AdjClose",compression="w",
	provider="yahoo")
	lx <- length(x)
	market <- as.numeric(diff(x)/as.numeric(x[-lx]))
	y <- get.hist.quote("penn",start=start,end=end,quote="AdjClose",compression="w",
	provider="yahoo")
	ly <- length(y)
	stock <- as.numeric(diff(y)/as.numeric(y[-ly]))
	beta.het(stock,market,rkfree,"PENN")
